# Supplementary material for: Transcription factors that mediate epithelial–mesenchymal transition lead to multidrug resistance by upregulating ABC transporters
Source: PubMed Central journal article supplement — Cell Death Dis. 2011 Jul 7;2(7):e179–. doi: 10.1038/cddis.2011.61 (PMC3199722; doi:10.1038/cddis.2011.61), 2011-07-07
Supplement: cddis201161x1.pdf [file cddis201161x1.pdf]

## **Supplementary Information**

### **Title:**

**Transcription factors that mediate epithelial-mesenchymal transition lead to multidrug resistance by upregulating ABC transporters**

**Running title:** EMT transcription factors regulate ABC transporters

**Authors:** Meera Saxena, Mary Ann Stephens, Hansi Pathak and Annapoorni Rangarajan

**Figure S1**

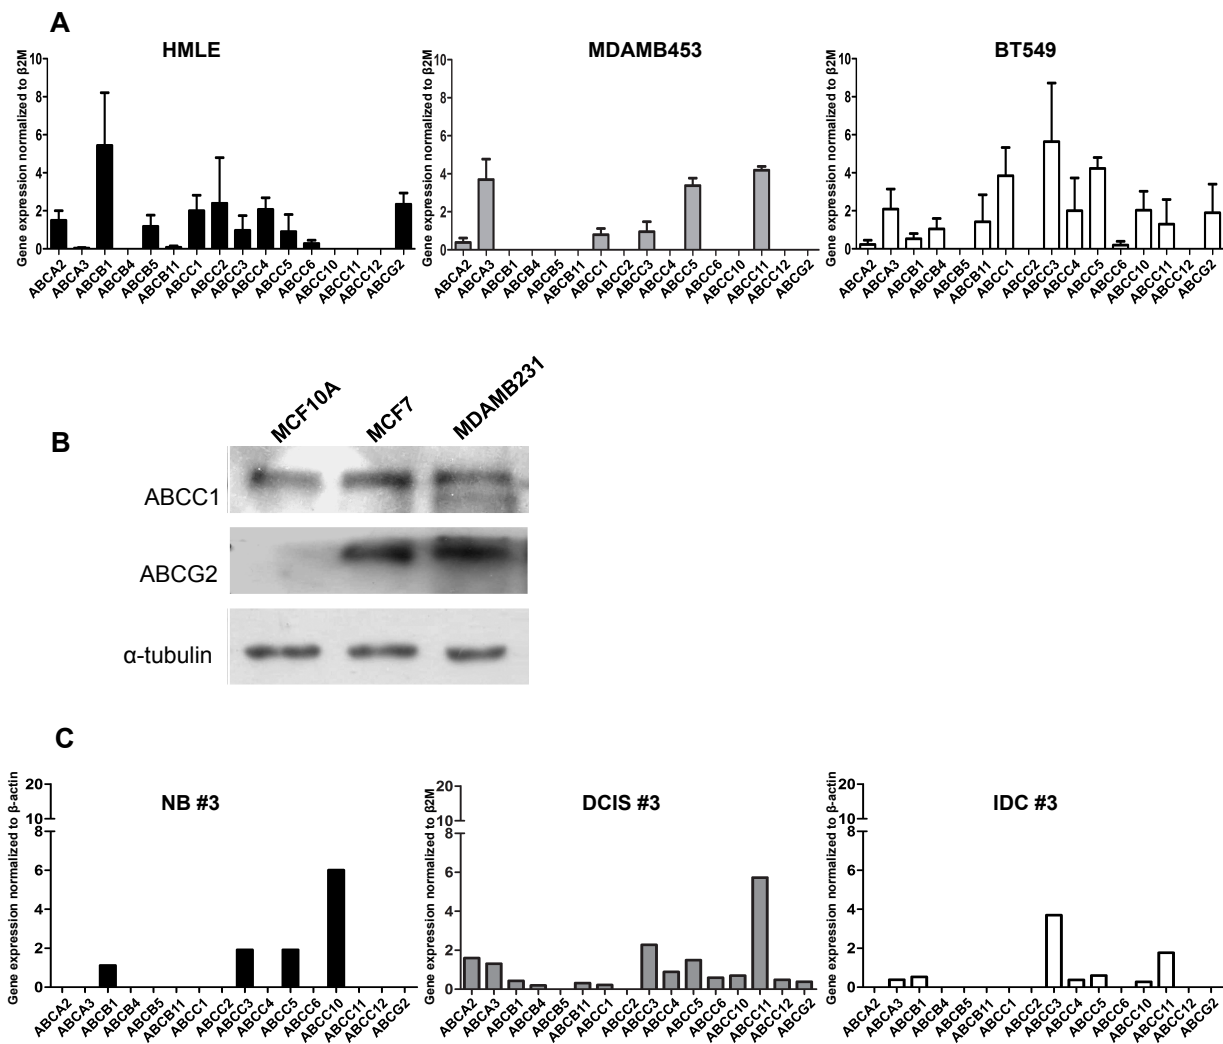

**Figure S2**

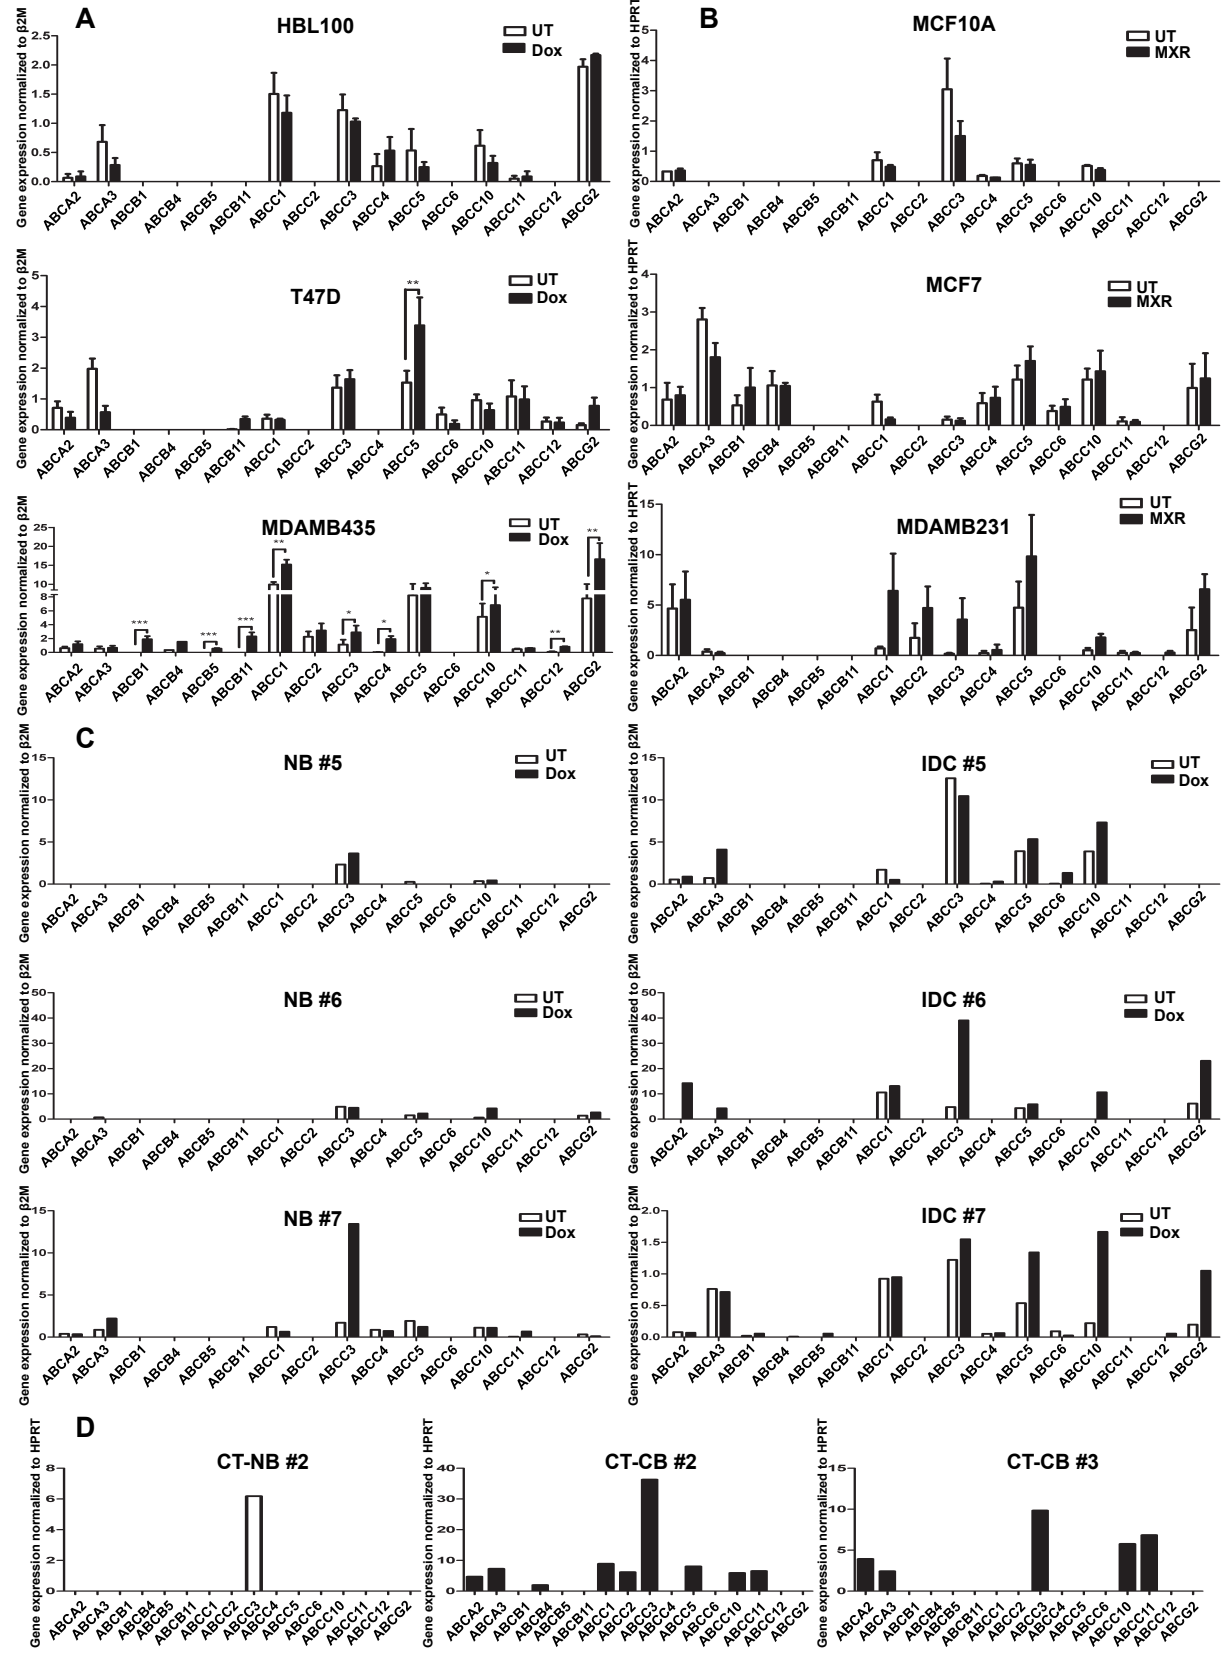

**Figure S3**

**A**

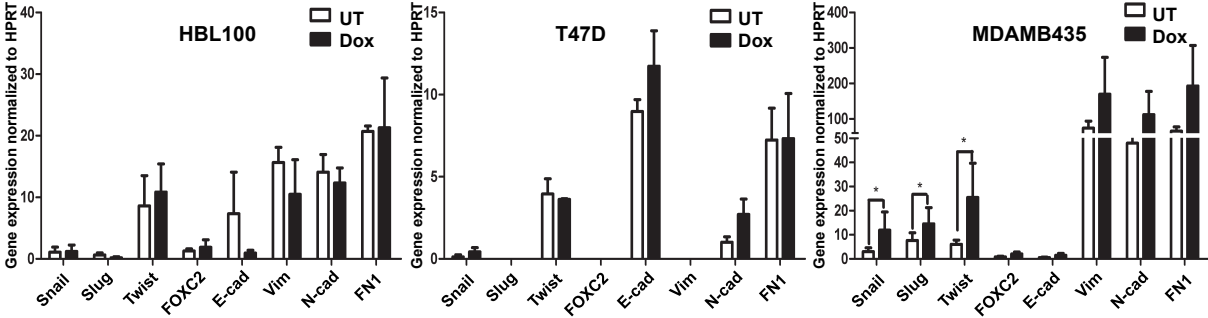

**B**

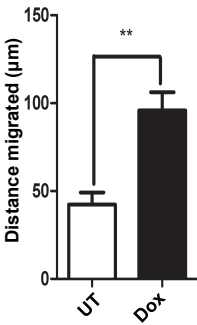

**Figure S4**

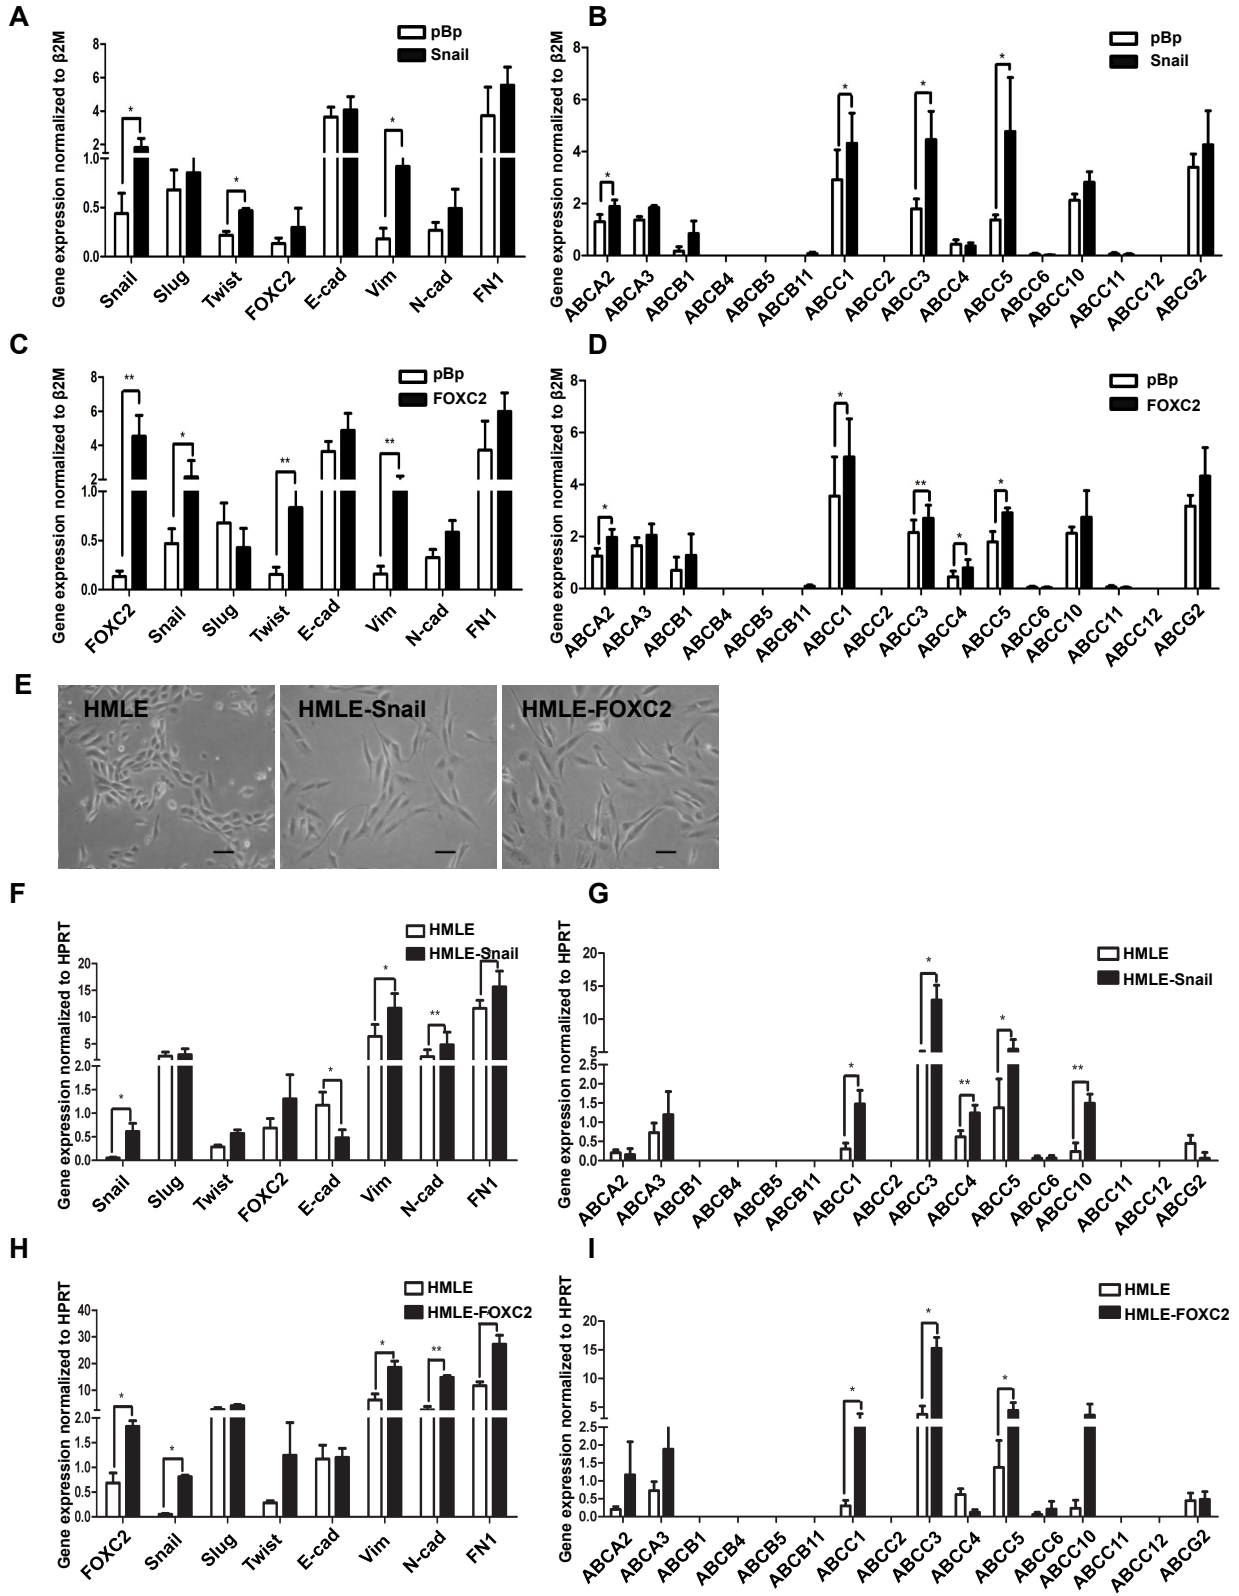

Figure S5

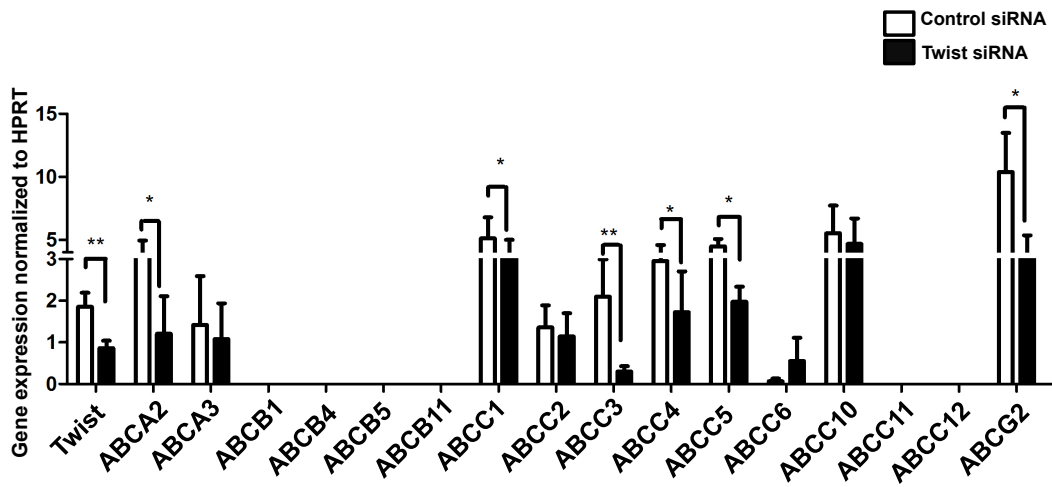



## SUPPLEMENTARY FIGURE LEGENDS

### **Figure S1. Breast epithelial cells have a heterogeneous expression of ABC transporters.**

(A) Representative graphs showing relative mRNA expression of ABC transporters in immortalized HMLE, non-invasive MDAMB453 and invasive BT549 breast epithelial cell lines as analyzed by RT-PCR, n=3. (B) Immunoblot analysis of whole-cell lysates of MCF10A, MCF7 and MDAMB231 breast epithelial cell lines for the expression of ABCC1 and ABCG2 transporters. ABCB1 expression was not detected in any of the cell lines.  $\alpha$ -tubulin served as the loading control. (C) Graphs represent relative mRNA expression of 16 ABC transporters in primary normal (NB), DCIS and IDC breast samples as analyzed by RT-PCR. n=3 for NB, n=6 for DCIS, and n=3 for IDC samples.

### **Figure S2. Dox treatment upregulates ABC transporter expression only in invasive cells.**

(A) Graphs represent relative mRNA expression of 16 ABC transporters after one-week Dox treatment in HBL100, T47D and MDAMB435 breast epithelial cell lines, n=3. (B) Graphs represent relative mRNA expression of 16 ABC transporters on one-week MXR treatment in MCF10A, MCF7 and MDAMB231 cells, n=3. (C) Graphs represent relative mRNA expression of 16 ABC transporters after one-week Dox treatment in multiple primary normal (NB) and tumor (IDC) derived breast epithelial cells. (D) Graphs represent relative mRNA expression of ABC transporters in chemotherapy treated primary normal (CT-NB) and tumor (CT-CB) breast samples.

### **Figure S3. Dox treatment of invasive cells leads to upregulation of EMT markers and invasiveness.**

(A) Graphs represent relative mRNA expression of EMT markers after one-week Dox treatment in HBL100, T47D and MDAMB435 breast epithelial cell lines, n=3. (B) Graph



represents distance migrated by untreated and Dox treated MDAMB435 cells in 24 hours in wound healing assay, n=9.

**Figure S4. EMT induction upregulates ABC transporter expression.**

Graphs represent relative mRNA expression of EMT markers (A) and ABC transporters (B) on transient overexpression of Snail in MCF7 cells, n=4. Graphs represent relative mRNA expression of EMT markers (C) and ABC transporters (D) on transient overexpression of FOXC2 in MCF7 cells, n=4. (E) Phase contrast photomicrographs of parent HMLE cells and HMLE cells stably overexpressing Snail and FOXC2. Scale bar = 100  $\mu$ m. Graphs represent relative mRNA expression of EMT markers (F) and ABC transporters (G) on stable overexpression of Snail in HMLE cells, n=3. Graphs represent relative mRNA expression of EMT markers (H) and ABC transporters (I) on stable overexpression of FOXC2 in HMLE cells, n=3.

**Figure S5. Reversal of EMT leads to downregulation of ABC transporters.**

Graph represents relative mRNA expression of ABC transporters after 72 hours of Twist knockdown in invasive MDAMB231 cells, n=6.

**Figure S6. Time-course assay with Doxorubicin.**

Gel pictures depict the expression of ABC transporters in MDAMB435 and MDAMB231 cells on time-course treatment with Dox. In MDAMB435 cells, while ABCC1 and ABCG2 showed upregulation by 48 hours and 72 hours, ABCB1 induction was observed only at one-week time point. In MDAMB231 cells a time-course revealed an increase in several ABC transporters as

early as 72 hours.  $\beta$ 2-microglobulin was used as a normalizing control.

**Table S1: Breast epithelial cells have a heterogeneous expression of ABC transporters.**

|                 | ABCA2 | ABCA3    | ABCB1         | ABCB4 | ABCB5 | ABCB11 | ABCC1    | ABCC2 | ABCC3         | ABCC4 | ABCC5         | ABCC6 | ABCC10  | ABCC11  | ABCC12 | ABCG2 |
|-----------------|-------|----------|---------------|-------|-------|--------|----------|-------|---------------|-------|---------------|-------|---------|---------|--------|-------|
| <b>MCF10A</b>   | ++    | -        | -             | -     | -     | -      | ++       | -     | ++<br>++<br>+ | ++    | ++            | -     | +       | -       | -      | -     |
| <b>HBL100</b>   | ++    | ++       | -             | -     | -     | -      | ++<br>+  | -     | ++<br>+       | +     | ++            | -     | ++<br>+ | +       | -      | ++    |
| <b>HMLE</b>     | +     | +        | ++<br>++<br>+ | -     | +     | +      | +        | ++    | +             | +     | +             | +     | -       | -       | -      | ++    |
| <b>MCF7</b>     | ++    | ++       | +             | -     | -     | +      | ++       | -     | ++            | +     | ++<br>+       | -     | ++      | +       | -      | +     |
| <b>T47D</b>     | ++    | ++<br>++ | -             | -     | -     | +      | +        | -     | ++<br>++      | -     | ++<br>++      | ++    | ++<br>+ | ++      | ++     | +     |
| <b>MDAMB453</b> | +     | ++       | -             | -     | -     | -      | +        | -     | +             | -     | ++            | -     | -       | ++<br>+ | -      | -     |
| <b>MDAMB231</b> | +     | +        | -             | -     | -     | -      | ++<br>+  | ++    | +             | ++    | ++<br>++<br>+ | -     | ++<br>+ | -       | -      | ++    |
| <b>MDAMB435</b> | +     | +        | -             | +     | -     | -      | ++<br>++ | ++    | ++            | ++    | ++<br>++      | -     | ++<br>+ | +       | +      | ++    |
| <b>BT549</b>    | +     | +        | +             | +     | -     | +      | ++       | -     | ++<br>+       | +     | ++<br>+       | +     | +       | +       | -      | +     |

Tabulated expression of 16 ABC transporters in immortalized, non-invasive and invasive breast epithelial cell lines, n = 3. mRNA expression as detected by relative RT-PCR has been normalized to  $\beta$ 2-microglobulin levels and the quantified data (in arbitrary units, AU) has been tabulated as follows, -: expression not detected; +: 0-2 AU; ++: 2.1-4 AU; +++: 4.1-6 AU; ++++:>6 AU.

6.1-8 AU; +++++: 8.1-10 AU. The data for this table is represented in **Figure 1** and **Figure S1** in form of individual graphs for each cell line.

**Table S2: Concentrations of drugs used in Figure 2 and 3.**

The optimum concentration of drugs were chosen based on MTT assays such that 80-85% cells were viable at the end of 48 hours of drug treatment which usually resulted in at least 10-15% of viable cells at the end of one-week of treatment.

| Cell line name | Doxorubicin | Mitoxantrone |
|----------------|-------------|--------------|
| MCF10A         | 200 nM      | 200 nM       |
| HBL100         | 20 nM       | -            |
| HMLE           | 20 nM       | -            |
| MCF7           | 200 nM      | 200 nM       |
| T47D           | 200 nM      | -            |
| MDAMB231       | 200 nM      | 200 nM       |
| MDAMB435       | 200 nM      | -            |

**Table S3: Sequence of primers used for RT-PCR analysis in Figures 1, 2, 3, 4 and 5.**

| <b>Gene name</b> | <b>Primer sequence (5'→ 3')</b> |
|------------------|---------------------------------|
| ABCA2 Fwd        | ATGTCAGCCTGCAAGAGGTG            |
| ABCA2 Rev        | AGATCTGGGAGAAGAGTGCC            |
| ABCA3 Fwd        | AGGAAAGGAGGCTGAAGGAG            |
| ABCA3 Rev        | GGTGCTGACCATGAAGCTGAAG          |
| ABCB1 Fwd        | TGACAT TTATTCAAAGTTAAAAGCA      |
| ABCB1 Rev        | TAGACACTTTATGCAAAC ATTTCAA      |
| ABCB4 Fwd        | GCATCAGCAGCAAACAAAAA            |
| ABCB4 Rev        | GCAGCGACAAGGAAAAGTTC            |
| ABCB5 Fwd        | TTCATCCTCCGTGGCTTATC            |
| ABCB5 Rev        | ACGATTGCTATTTGGGAACG            |
| ABCB11 Fwd       | GTGGCCAGAAACAAAGGGTA            |
| ABCB1 Rev        | GCGATGAGCAACTGAAATGA            |
| ABCC1 Fwd        | AGCCGGTGAAGGTTGTGTAC            |
| ABCC1 Rev        | TGACGAAGCAGATGTGGAAG            |
| ABCC2 Fwd        | TGCTTCCTGGGGATAATCAG            |
| ABCC2 Rev        | ACGGATAACTGGCAAACCTG            |
| ABCC3 Fwd        | CCTTTGCCAACTTTCTCTGC            |
| ABCC3 Rev        | AGGGCACTCAGCTGTCTCAT            |
| ABCC4 Fwd        | GGTTCCCTTGGAATCATTT             |
| ABCC4 Rev        | AATCCTGGTGTGCATCAAACAG          |
| ABCC5 Fwd        | ACCCGTTGTTGCCATCTTAG            |
| ABCC5 Rev        | GCTTTGACCCAGGCATACAT            |
| ABCC6 Fwd        | GTGGTGTGTTGCTGTCCACAC           |
| ABCC6 Rev        | ACGACACCAGGGTCAACTTC            |
| ABCC10 Fwd       | ATTGCCCATAGGCTCAACAC            |
| ABCC10 Rev       | AGCAGCCAGCACCTCTGTAT            |
| ABCC11 Fwd       | GGCTGAGCTACTGGTTGGAG            |
| ABCC11 Rev       | TGGTGAAAATCCCTGAGGAG            |

|                             |                        |
|-----------------------------|------------------------|
| ABCC12 Fwd                  | GGTGTTTCATGCTGGTGTTTGG |
| ABCC12 Rev                  | GCTCGTCCATATCCTTGGAA   |
| ABCG2 Fwd                   | GCAGATGCCTTCTTCGTTATG  |
| ABCG2 Rev                   | TCTTCGCCAGTACATGTTGC   |
| E-cadherin Fwd              | TGCCCAGAAAATGAAAAAGG   |
| E-cadherin Rev              | GTGTATGTGGCAATGCGTTC   |
| Slug Fwd                    | CTTTTTCTTGCCCTCACTGC   |
| Slug Rev                    | GCTTCGGAGTGAAGAAATG    |
| Snail Fwd                   | ACCCACATCCTTCTCACTG    |
| Snail Rev                   | TACAAAAACCCACGCAGACA   |
| hTwist Fwd                  | GTCCGCAGTCTTACGAGGAG   |
| hTwist Rev                  | CCAGCTTGAGGGTCTGAATC   |
| mTwist1 Fwd                 | CCCCACTTTTTGACGAAGAA   |
| mTwist1 Rev                 | GATGATTTGCAGGCCAGTTT   |
| FOXC2 Fwd                   | AGTTCATCATGGACCGCTTC   |
| FOXC2 Rev                   | TCTCCTTGGACACGTCCTTC   |
| N-cadherin Fwd              | GACAATGCCCTCAAGTGTT    |
| N-cadherin Rev              | CCATTAAGCCGAGTGATGGT   |
| Vimentin Fwd                | GAGAACTTTGCCGTTGAAGC   |
| Vimentin Rev                | TCCAGCAGCTTCCTGTAGGT   |
| Fibronectin1 Fwd            | ACCAACCTACGGATGACTCG   |
| Fibronectin1 Rev            | GCTCATCATCTGGCCATTTT   |
| $\beta$ 2-microglobulin Fwd | CCTGAATTGCTATGTGTCTGGG |
| $\beta$ 2-microglobulin Rev | TGATGCTGCTTACATGTCTCGA |
| $\beta$ -actin Fwd          | ACTGGAACGGTGAAGGTGAC   |
| $\beta$ -actin Rev          | AGAGAAGTGGGGTGGCTTTT   |
| HPRT Fwd                    | TGCTCGAGATGTGATGAAGG   |
| HPRT Rev                    | TCCCCTGTTGACTGGTCATT   |

**Table S4: Sequence of primers used for ChIP experiment (related to Figure 6).**

| <b>Name of primer</b>  | <b>Sequence (5'→ 3')</b> |
|------------------------|--------------------------|
| ABCC4 ChIP 1 Fwd       | CAGGGGGCGGGCTGCTAGA      |
| ABCC4 ChIP 1 Rev       | GCAGAGCGCGCGGCAAG        |
| ABCC5 ChIP 1 Fwd       | CGGGTTAGACGCGGGCTACG     |
| ABCC5 ChIP 1 Rev       | GCTGCCCCTCTTCCCACCGA     |
| ABCC5 ChIP Control Fwd | GAGTGGCTGCTCAAGTTCC      |
| ABCC5 ChIP Control Rev | GGCATAAATTGAAAAGATAAACCA |
